# Supplementary material for: The analytical and clinical validity of AI algorithms to score TILs in TNBC: can we use different machine learning models interchangeably?
Source: PubMed Central journal article supplement (PMC11615110; doi:10.1016/j.eclinm.2024.102928), 2024-11-15
Supplement: mmc1.pdf [file mmc1.pdf]

| Characteristic            | All, N = 79 <sup>1</sup> | Train_10, N = 10 <sup>1</sup> | Train_20, N = 18 <sup>1</sup> | Train_30, N = 27 <sup>1</sup> | Train_40, N = 35 <sup>1</sup> | Train_50, N = 43 <sup>1</sup> | Validation, N = 36 <sup>1</sup> | p-value <sup>2</sup> |
|---------------------------|--------------------------|-------------------------------|-------------------------------|-------------------------------|-------------------------------|-------------------------------|---------------------------------|----------------------|
| Age                       |                          |                               |                               |                               |                               |                               |                                 | 0.9                  |
| <50                       | 21 (27%)                 | 3 (30%)                       | 4 (22%)                       | 7 (26%)                       | 7 (20%)                       | 9 (21%)                       | 12 (33%)                        |                      |
| >=50                      | 58 (73%)                 | 7 (70%)                       | 14 (78%)                      | 20 (74%)                      | 28 (80%)                      | 34 (79%)                      | 24 (67%)                        |                      |
| Size                      |                          |                               |                               |                               |                               |                               |                                 | >0.9                 |
| <=20                      | 37 (47%)                 | 6 (60%)                       | 9 (50%)                       | 13 (48%)                      | 17 (49%)                      | 21 (49%)                      | 16 (44%)                        |                      |
| >20                       | 42 (53%)                 | 4 (40%)                       | 9 (50%)                       | 14 (52%)                      | 18 (51%)                      | 22 (51%)                      | 20 (56%)                        |                      |
| Continuous Size           | 21 (15, 31)              | 16 (15, 29)                   | 22 (15, 30)                   | 21 (15, 30)                   | 21 (15, 30)                   | 21 (15, 30)                   | 22 (15, 32)                     | >0.9                 |
| Nodal Status              |                          |                               |                               |                               |                               |                               |                                 | >0.9                 |
| Neg                       | 52 (66%)                 | 7 (70%)                       | 11 (61%)                      | 17 (63%)                      | 22 (63%)                      | 28 (65%)                      | 24 (67%)                        |                      |
| Pos                       | 27 (34%)                 | 3 (30%)                       | 7 (39%)                       | 10 (37%)                      | 13 (37%)                      | 15 (35%)                      | 12 (33%)                        |                      |
| Grade                     |                          |                               |                               |                               |                               |                               |                                 | 0.2                  |
| 2                         | 17 (22%)                 | 3 (30%)                       | 7 (39%)                       | 11 (41%)                      | 11 (31%)                      | 12 (28%)                      | 5 (14%)                         |                      |
| 3                         | 61 (78%)                 | 7 (70%)                       | 11 (61%)                      | 16 (59%)                      | 24 (69%)                      | 31 (72%)                      | 30 (86%)                        |                      |
| Unknown                   | 1                        | 0                             | 0                             | 0                             | 0                             | 0                             | 1                               |                      |
| Administered Chemotherapy |                          |                               |                               |                               |                               |                               |                                 | 0.9                  |
| NoChemo                   | 12 (21%)                 | 3 (38%)                       | 4 (27%)                       | 6 (25%)                       | 8 (26%)                       | 9 (24%)                       | 3 (15%)                         |                      |
| Chemo                     | 46 (79%)                 | 5 (63%)                       | 11 (73%)                      | 18 (75%)                      | 23 (74%)                      | 29 (76%)                      | 17 (85%)                        |                      |
| Unknown                   | 21                       | 2                             | 3                             | 3                             | 4                             | 5                             | 16                              |                      |
| OS                        | 10.6 (6.3, 16.4)         | 10.9 (8.3, 11.6)              | 9.9 (5.6, 12.2)               | 10.8 (5.9, 14.6)              | 11.6 (6.8, 15.7)              | 11.1 (6.8, 15.7)              | 9.7 (6.1, 17.0)                 | 0.8                  |
| Unknown                   | 2                        | 2                             | 2                             | 2                             | 2                             | 2                             | 0                               |                      |

<sup>1</sup> n (%); Median (IQR)

<sup>2</sup> Fisher's exact test; Kruskal-Wallis rank sum test
